# Supplementary material for: Sequestering uranium from UO2(CO3)34−in seawater with amine ligands: density functional theory calculations
Source: Royal Society of Chemistry journal article supplement (doi:10.1039/c5cp00931f), 2015-01-01
Supplement: c5cp00931f1.pdf [file c5cp00931f1.pdf]

# Sequestering Uranium from $\text{UO}_2(\text{CO}_3)_3^{4-}$ in Seawater with Amine Ligands: Density functional theory calculations

Xiaojing Guo,<sup>\*a</sup>Liangliang Huang,<sup>b</sup>Cheng Li,<sup>a</sup>Jiangtao Hu,<sup>a</sup>Guozhong Wu<sup>a</sup> and Ping Huai<sup>a</sup>

<sup>a</sup>Shanghai Institute of Applied Physics, Chinese Academy of Sciences, Shanghai 201800, China.

<sup>b</sup>School of Chemical, Biological & Materials Engineering, University of Oklahoma, Norman, OK 73019, USA

Corresponding authors: [guoxiaojing@sinap.ac.cn](mailto:guoxiaojing@sinap.ac.cn)

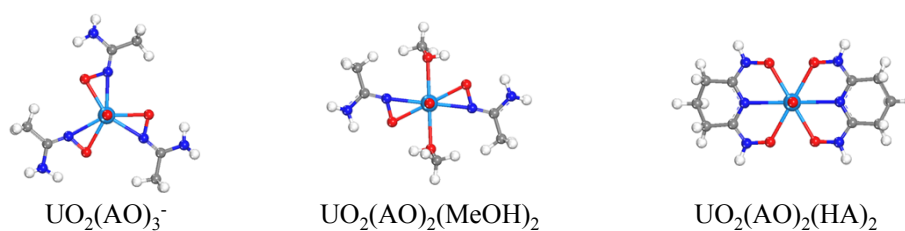

Figure S1 Optimized structures of  $\text{UO}_2(\text{AO})_3^-$ ,  $\text{UO}_2(\text{AO})_2(\text{MeOH})_2$  and  $\text{UO}_2(\text{AO})_2(\text{HA})_2$  calculated by the B3LYP method. White, green, red, blue, and light blue spheres represent H, C, O, N, and U, respectively.

Table S1 Selected average bond lengths (Å) for  $\text{UO}_2(\text{AO})_3^-$ ,  $\text{UO}_2(\text{AO})_2(\text{MeOH})_2$  and  $\text{UO}_2(\text{AO})_2(\text{HA})_2$  calculated by the B3LYP method in comparison with previous theoretical and experimental results.

| Species                                   | method                      | U=O   | U-O   | U-N   | U-OH  |
|-------------------------------------------|-----------------------------|-------|-------|-------|-------|
| $\text{UO}_2(\text{AO})_3^-$              | B3LYP, gas                  | 1.799 | 2.394 | 2.466 |       |
|                                           | B3LYP, gas <sup>(a)</sup>   | 1.800 | 2.393 | 2.466 |       |
|                                           | B3LYP, gas <sup>(b)</sup>   | 1.803 | 2.381 | 2.472 |       |
|                                           | B3LYP, sol                  | 1.826 | 2.349 | 2.441 |       |
| $\text{UO}_2(\text{AO})_2(\text{MeOH})_2$ | B3LYP, gas                  | 1.789 | 2.351 | 2.438 | 2.601 |
|                                           | B3LYP, gas <sup>(c)</sup>   | 1.784 | 2.349 | 2.424 | 2.624 |
|                                           | B3LYP, gas <sup>(d)</sup>   | 1.793 | 2.344 | 2.434 | 2.602 |
|                                           | X-ray, solid <sup>(e)</sup> | 1.789 | 2.383 | 2.398 | 2.458 |
|                                           | B3LYP, sol                  | 1.811 | 2.315 | 2.433 | 2.570 |
|                                           | B3LYP, sol <sup>(f)</sup>   | 1.817 | 2.307 | 2.435 | 2.557 |
| $\text{UO}_2(\text{HA})_2$                | B3LYP, gas                  | 1.783 | 2.504 | 2.652 |       |
|                                           | B3LYP, gas <sup>(g)</sup>   | 1.784 | 2.503 | 2.655 |       |
|                                           | B3LYP, gas <sup>(h)</sup>   | 1.798 | 2.498 | 2.691 |       |
|                                           | X-ray, solid <sup>(i)</sup> | 1.785 | 2.482 | 2.563 |       |
|                                           | B3LYP, sol                  | 1.802 | 2.487 | 2.631 |       |
|                                           | B3LYP, sol <sup>(j)</sup>   | 1.810 | 2.468 | 2.635 |       |

<sup>a</sup>Theoretical results for  $\text{UO}_2(\text{AO})_3^-$  from ref 1. <sup>b</sup>Theoretical results for  $\text{UO}_2(\text{AO})_3^-$  from ref 2. <sup>c</sup>Theoretical results for  $\text{UO}_2(\text{AO})_2(\text{MeOH})_2$  from ref 1. <sup>d</sup>Theoretical results for  $\text{UO}_2(\text{AO})_2(\text{MeOH})_2$  from ref 2. <sup>e</sup>X-ray crystallographic results for

UO<sub>2</sub>(AO)<sub>2</sub>(MeOH)<sub>2</sub> from ref 1. <sup>f</sup>Theoretical results for UO<sub>2</sub>(AO)<sub>2</sub>(MeOH)<sub>2</sub> from ref 2. <sup>g</sup>Theoretical results for UO<sub>2</sub>(HA)<sub>2</sub> from ref 2. <sup>h</sup>Theoretical results for UO<sub>2</sub>(HA)<sub>2</sub> from ref 3. <sup>i</sup>X-ray crystallographic results for UO<sub>2</sub>(HA)<sub>2</sub> from ref 3. <sup>j</sup>Theoretical results for UO<sub>2</sub>(HA)<sub>2</sub> from ref 2.

As shown in Table S1, the predicted U=O and U-O bond distances by B3LYP functional are in good agreement with the X-ray crystallographic results. Though the calculated U-OH distance for UO<sub>2</sub>(AO)<sub>2</sub>(MeOH)<sub>2</sub> and U-N distance for UO<sub>2</sub>(HA)<sub>2</sub> are in good agreement with other reported theoretical results, they are longer than the X-ray crystallographic results with relatively large differences of 0.143 and 0.089 Å. This may be attributed to the crystal packing effects, also as presented in Ref.2 and Ref.3. Compared to other published theoretical results, the calculated U-OH distance for UO<sub>2</sub>(AO)<sub>2</sub>(MeOH)<sub>2</sub> and U-N distance for UO<sub>2</sub>(HA)<sub>2</sub> are in better agreement with the X-ray crystallographic results. Thus, the theoretical method we used is reliable in predicting the structures of uranyl complexes. All the calculations were carried out at the B3LYP/6-31++G\*/RECP level of theory”.

#### References

- [1] S. Vukovic, L. A. Watson, S. O. Kang, R. Custelcean and B. P. Hay, *Inorganic Chemistry*, 2012, **51**, 3855.
- [2] C.-Z. Wang, J.-H. Lan, Q.-Y. Wu, Q. Luo, Y.-L. Zhao, X.-K. Wang, Z.-F. Chai and W.-Q. Shi, *Inorganic Chemistry*, 2014, **53**, 9466.
- [3] Tian, G.; Teat, S. J.; Zhang Z.; Rao, L. *Dalton Transactions*. **2012**, *41*, 11579.

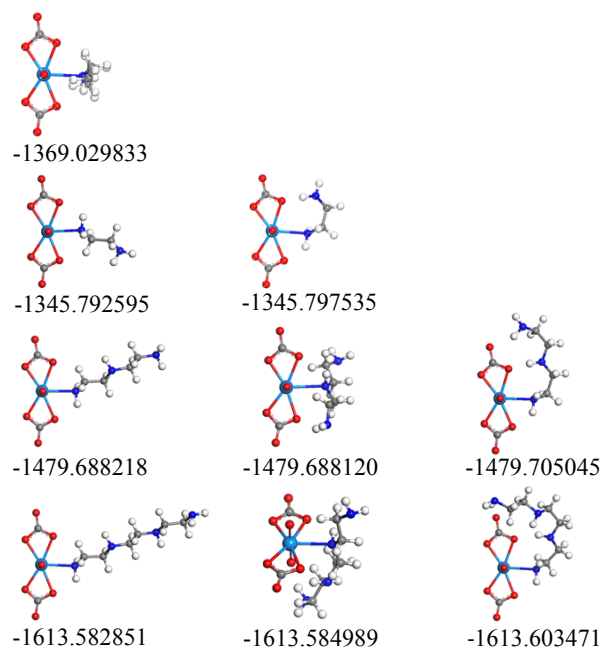

Figure S2. Optimized structures and total energies after zero-point energy correction (in hartrees) of  $\text{UO}_2\text{L}(\text{CO}_3)_2^{2-}$  (L=DEA, EDA, DETA and TETA) in gas phase by the B3LYP method.

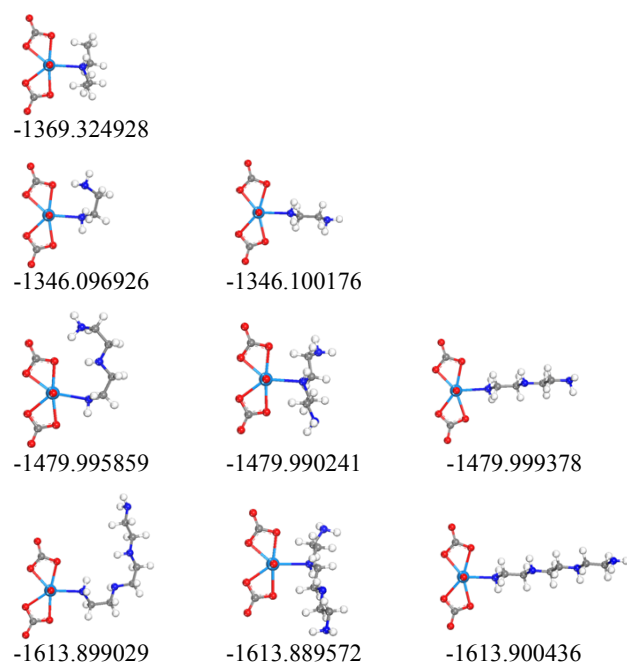

Figure S3. Optimized structures and total energies after zero-point energy correction (in hartrees) of  $\text{UO}_2\text{L}(\text{CO}_3)_2^{2-}$  (L=DEA, EDA, DETA and TETA) in aqueous solution by the B3LYP method.

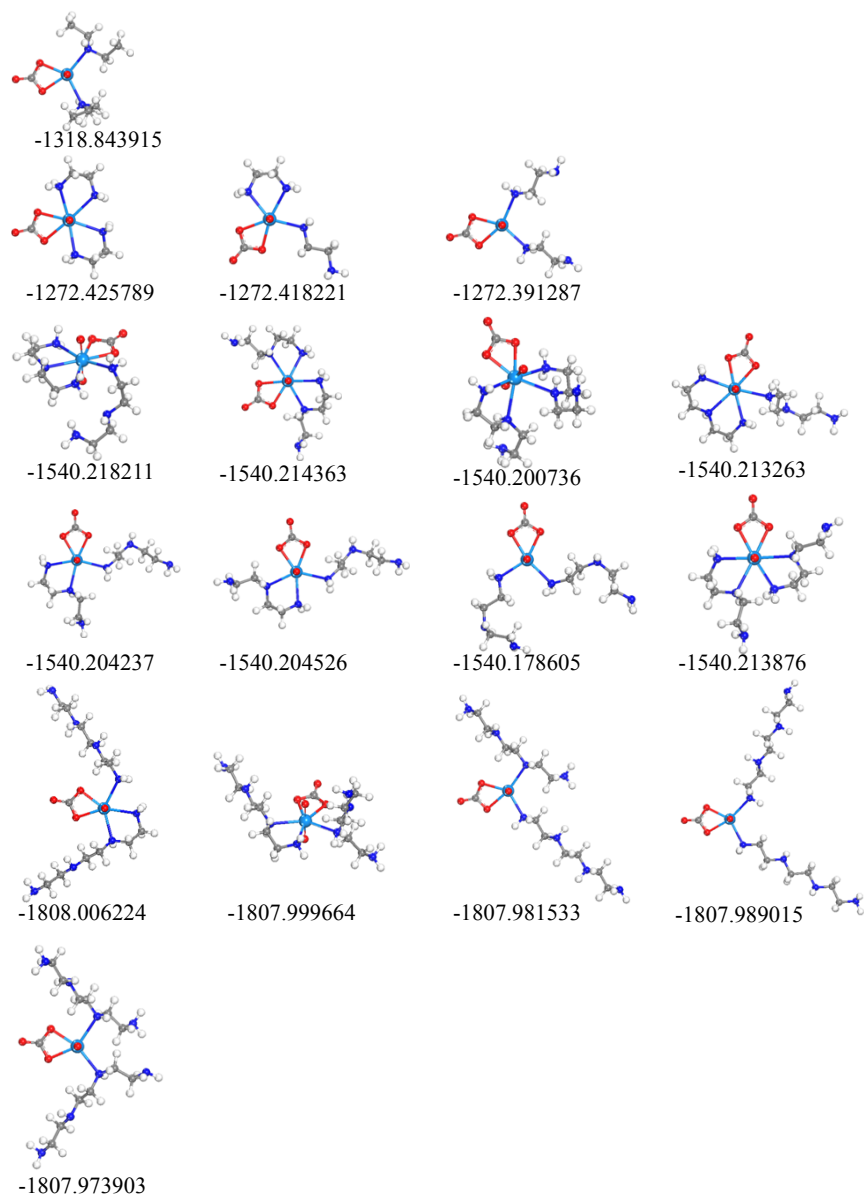

Figure S4. Optimized structures and total energies after zero-point energy correction (in hartrees) of  $\text{UO}_2\text{L}_2\text{CO}_3$  (L=DEA, EDA, DETA and TETA) in aqueous solution by the B3LYP method.

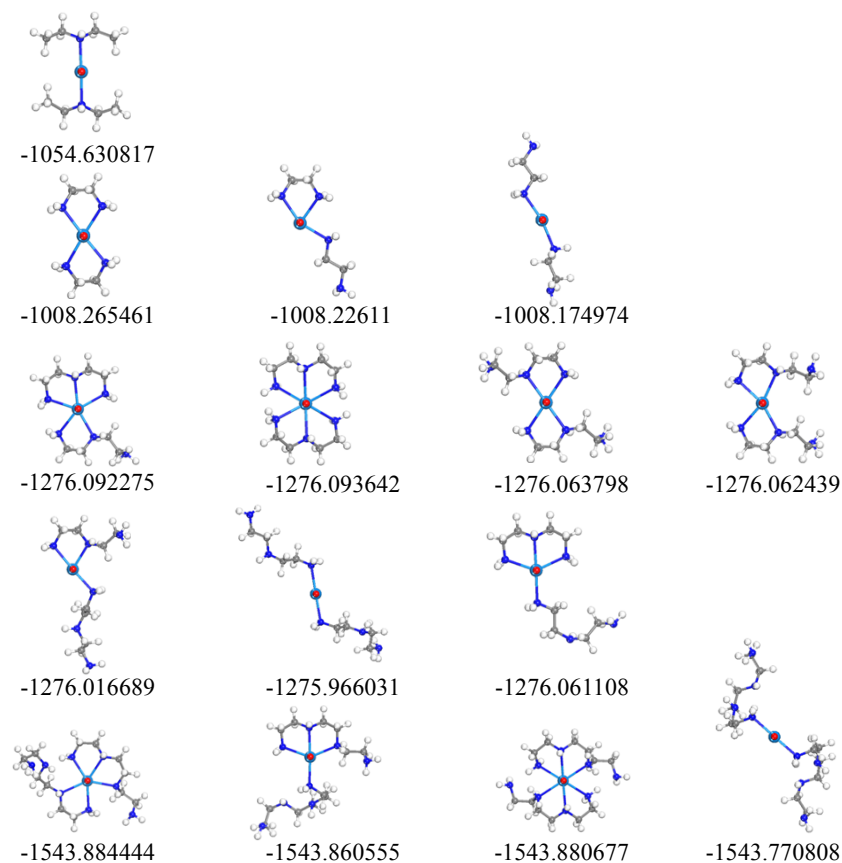

Figure S5. Optimized structures and total energies after zero-point energy correction (in hartrees) of  $\text{UO}_2\text{L}_2^{2+}$  (L=DEA, EDA, DETA and TETA) in aqueous solution by the B3LYP method.

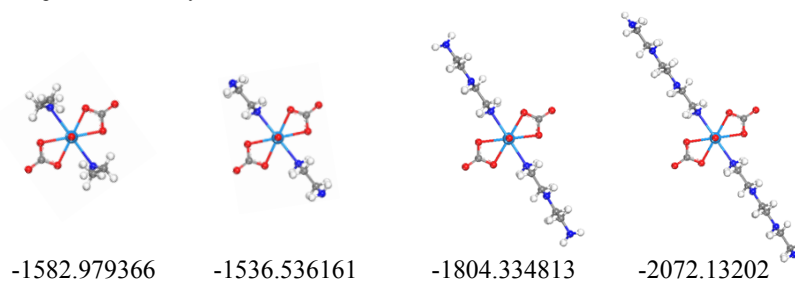

Figure S6. Optimized structures and total energies after zero-point energy correction (in hartrees) of  $\text{UO}_2\text{L}_2(\text{CO}_3)_2^{2-}$  (L=DEA, EDA, DETA and TETA) in aqueous solution by the B3LYP method.

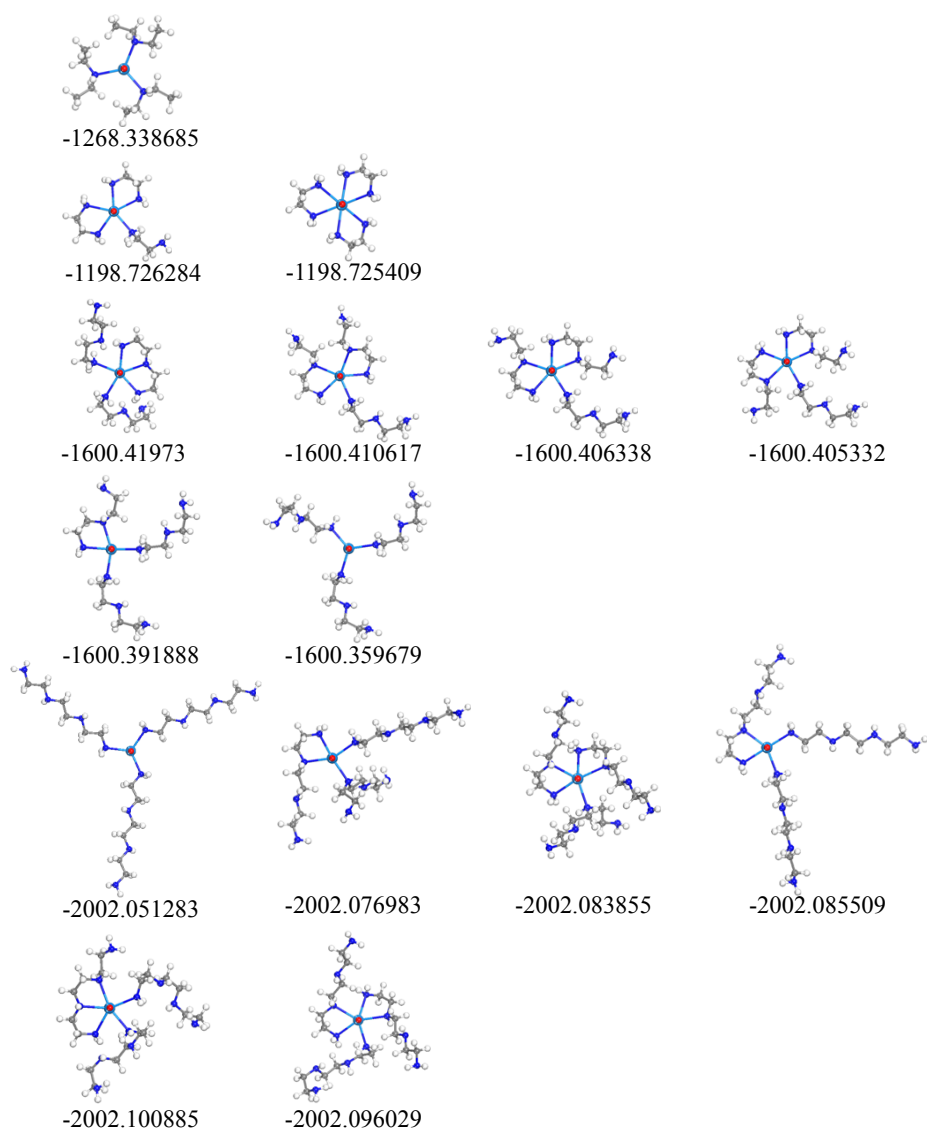

Figure S6. Optimized structures and total energies after zero-point energy correction (in hartrees) of  $\text{UO}_2\text{L}_3^{2+}$  (L=DEA, EDA, DETA and TETA) in aqueous solution by the B3LYP method.

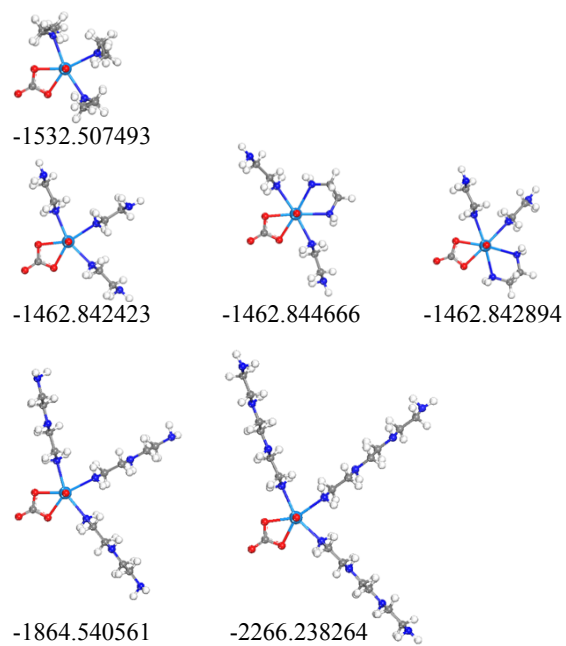

Figure S8. Optimized structures and total energies after zero-point energy correction (in hartrees) of  $\text{UO}_2\text{L}_3\text{CO}_3$  (L=DEA, EDA, DETA and TETA) in aqueous solution by the B3LYP method.

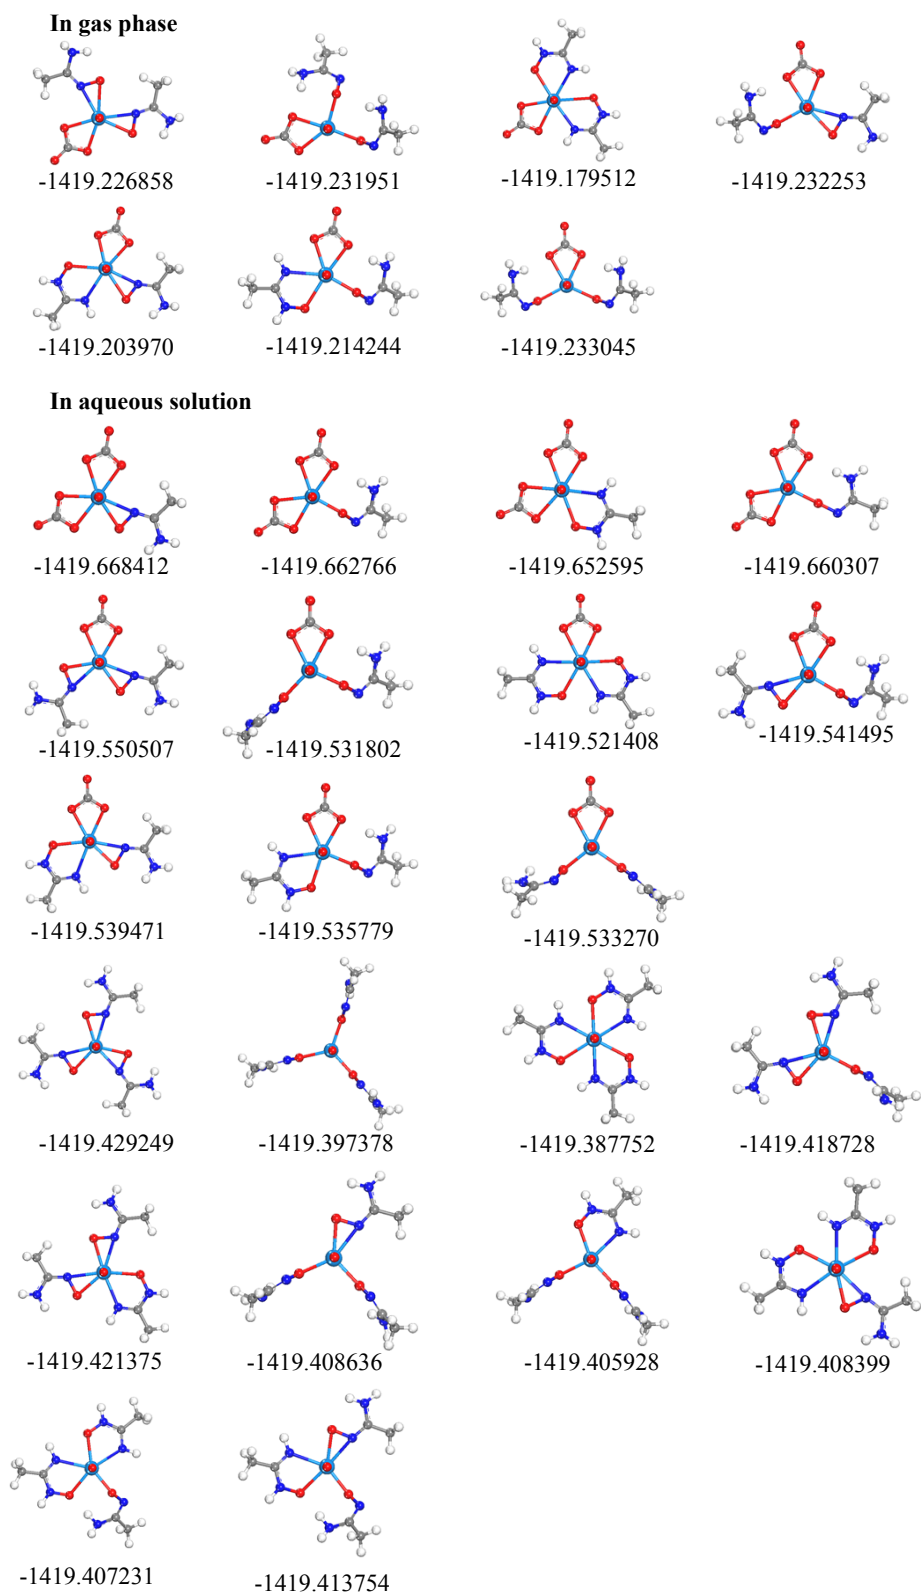

Figure S9. Optimized structures and total energies after zero-point energy correction (in hartrees) of  $\text{UO}_2(\text{AO})(\text{CO}_3)_2^{3-}$ ,  $\text{UO}_2(\text{AO})_2(\text{CO}_3)_2^{2-}$ , and  $\text{UO}_2(\text{AO})_3^-$  by the B3LYP method.



Table S2 Wiberg bond indices(WBIs) of U–N bonds and natural charges on the U and O<sub>axial</sub> atoms for UO<sub>2</sub>L<sub>2</sub>CO<sub>3</sub>, UO<sub>2</sub>L<sub>2</sub><sup>2+</sup>, UO<sub>2</sub>L<sub>2</sub>(CO<sub>3</sub>)<sub>2</sub><sup>2-</sup>, UO<sub>2</sub>L<sub>3</sub><sup>2+</sup> and UO<sub>2</sub>L<sub>3</sub>CO<sub>3</sub>(L=DEA, EDA, DETA and TETA) in aqueous solution.

| Species                                                                      | Q(U)  | Q(O <sub>axial</sub> ) | U–N   | U–N   | U–N   | U–N   | U–N   | U–N   |
|------------------------------------------------------------------------------|-------|------------------------|-------|-------|-------|-------|-------|-------|
| UO <sub>2</sub> L <sub>2</sub> CO <sub>3</sub>                               |       |                        |       |       |       |       |       |       |
| L=DEA                                                                        | 1.775 | -0.541(-0.542)         | 0.418 | 0.386 |       |       |       |       |
| L=EDA                                                                        | 1.443 | -0.545(-0.544)         | 0.384 | 0.411 | 0.409 | 0.386 |       |       |
| L=DETA                                                                       | 1.473 | -0.552(-0.550)         | 0.372 | 0.408 | 0.427 | 0.339 |       |       |
| L=TETA                                                                       | 1.607 | -0.539(-0.538)         | 0.396 | 0.373 | 0.411 |       |       |       |
| UO <sub>2</sub> L <sub>2</sub> <sup>2+</sup>                                 |       |                        |       |       |       |       |       |       |
| L=DEA                                                                        | 2.308 | -0.534(-0.534)         | 0.480 | 0.484 |       |       |       |       |
| L=EDA                                                                        | 1.917 | -0.512(-0.512)         | 0.453 | 0.452 | 0.449 | 0.453 |       |       |
| L=DETA                                                                       | 1.667 | -0.545(-0.549)         | 0.373 | 0.374 | 0.371 | 0.415 | 0.371 | 0.415 |
| L=TETA                                                                       | 1.777 | -0.537(-0.539)         | 0.396 | 0.402 | 0.450 | 0.386 | 0.425 |       |
| UO <sub>2</sub> L <sub>2</sub> (CO <sub>3</sub> ) <sub>2</sub> <sup>2-</sup> |       |                        |       |       |       |       |       |       |
| L=DEA                                                                        | 1.472 | -0.583(-0.584)         | 0.330 | 0.329 |       |       |       |       |
| L=EDA                                                                        | 1.342 | -0.560(-0.558)         | 0.396 | 0.397 |       |       |       |       |
| L=DETA                                                                       | 1.344 | -0.560(-0.557)         | 0.394 | 0.394 |       |       |       |       |
| L=TETA                                                                       | 1.344 | -0.560(-0.557)         | 0.394 | 0.393 |       |       |       |       |
| UO <sub>2</sub> L <sub>3</sub> <sup>2+</sup>                                 |       |                        |       |       |       |       |       |       |
| L=DEA                                                                        | 2.131 | -0.526(-0.527)         | 0.435 | 0.425 | 0.432 |       |       |       |
| L=EDA                                                                        | 1.693 | -0.519(-0.520)         | 0.437 | 0.435 | 0.427 | 0.425 | 0.436 |       |
| L=DETA                                                                       | 1.699 | -0.530(-0.532)         | 0.426 | 0.403 | 0.456 | 0.460 | 0.426 |       |
| L=TETA                                                                       | 1.788 | -0.531(-0.535)         | 0.401 | 0.399 | 0.408 | 0.426 | 0.408 |       |
| UO <sub>2</sub> L <sub>3</sub> CO <sub>3</sub>                               |       |                        |       |       |       |       |       |       |
| L=DEA                                                                        | 1.789 | -0.585(-0.585)         | 0.355 | 0.357 | 0.354 |       |       |       |
| L=EDA                                                                        | 1.481 | -0.548(-0.548)         | 0.383 | 0.379 | 0.395 | 0.396 |       |       |
| L=DETA                                                                       | 1.583 | -0.529(-0.529)         | 0.405 | 0.406 | 0.413 |       |       |       |
| L=TETA                                                                       | 1.585 | -0.530(-0.529)         | 0.405 | 0.405 | 0.414 |       |       |       |
